# Supplementary material for: Formal modeling of a causal consistent distributed system and verification of its history via model checking using colored Petri net
Source: PeerJ Comput Sci. 2025 Jul 7;11:e2995. doi: 10.7717/peerj-cs.2995 (PMC12453694; doi:10.7717/peerj-cs.2995)
Supplement: Supplemental Information 2 [file peerj-cs-11-2995-s002.docx]

1: // Algorithm for group g's members
2: Initialization of the Fidge's vector clocks of all group g's members

3:

4: CO-multicast of message to g's members by process :

5: 1.

6: 2. B-multicast
7: When B-delivers from , with :

8: 1. It places in its hold-back queue
9: 2. Wait until and ;
10: 3. CO-deliver m; // after removing from the hold-back queue

11: 4. ;
